# Supplementary material for: The Classic: The Use of Free Osteoplasty Together with Trials on Arthrodesis and Joint Transplantation
Source: Springer Nature journal article supplement (doi:10.1007/s11999-008-0314-4), 2008-06-06
Supplement: MOESM1 [file 9119064]

# Die Verwendung der freien Knochenplastik nebst Versuchen über Gelenkversteifung und Gelenktransplantation.<sup>1)</sup>

Von

Professor Erich Lexer (Königsberg).

Eine grosse Anzahl osteoplastischer Operationen, bei welchen die freie Knochenplastik in Anwendung kam, festigte bei mir die Ueberzeugung, dass man diesem Verfahren eine grössere Aufgabe stellen darf, als dies bisher üblich war. Gestatten Sie mir deshalb, in kurzen Zügen zu berichten, bei welcher Gruppe von Fällen ich diese freie Knochenplastik verwendet habe.

Es handelt sich natürlich zunächst um bekannte Eingriffe:

1. um den Ersatz von Lücken der Schädelknochen,
2. um das Heben von eingesunkenen Stellen des Gesichtskelettes,
3. um vollständige Defecte der Röhrenknochen und des Unterkiefers,
4. um die Heilung von Pseudarthrosen.

Dann aber auch um neue Versuche:

5. zur Versteifung paralytischer Gelenke durch Bolzung der benachbarten Knochen,
6. um den Ersatz grosser Abschnitte der Röhrenknochen sammt einem Gelenkkopfe oder sammt beider Epiphysen; und schliesslich
7. um Versuche der Gelenktransplantation.

<sup>1)</sup> Vorgelesen am 1. Sitzungstage des XXXVII. Congresses der Deutschen Gesellschaft für Chirurgie, 21. April 1908.

Es ist am Menschen sicherlich nicht gleichgültig, ob man todtten oder lebenden Knochen zur Verpflanzung verwendet. Anfangs benutzte ich 24 Stunden lang ausgekochten Leichenknochen. Doch ergab sich, dass das Anwendungsgebiet verhältnissmässig sehr beschränkt ist. Das Ersatzstück muss stets mit ossificationsfähigem Boden in innige Berührung kommen, wie das ja auch aus den Versuchen von Barth und Marchand hervorgeht. Unter das Periost oder ins Knochenmark gebracht, heilt der Knochen ein; sind aber grössere periostlose und nicht wandständige Defecte zu überbrücken, so geht die das Stück ersetzende Wucherung von der Begrenzung der die Lücke bergenden Knochenenden zu langsam vor sich, so dass der übrige Theil der Resorption anheimfällt. Ich versuchte nach ausgedehnter Kniegelenkresection wegen Chondrom des Gelenkes, um die starke Verkürzung zu vermeiden, ein 20 cm lauges Stück einer Leichenulna einzubellen. Die periostlosen Weichtheile der Wunde rieb ich stark mit steriler Knochenasche ein, welche auch nach Heilung der Wunde in die Umgebung des Ersatzstückes eingespritzt wurde. Aber das Zwischenmuskelfgewebe, das bei Fracturen so oft den parastalen Callus bildet, liess sich dadurch nicht, wie nach den Versuchen von Barth erwartet werden durfte, zur Ossification anregen. Zwar gab es eine starke Calluswucherung von den Sägefächern der Tibia und des Femur aus, doch war diese nicht im Stande, das ganze Ersatzstück zu durchwachsen; in der Mitte verfiel es der Resorption und musste nach einigen Monaten wegen Fisteleiterungen wieder entfernt werden.

Auffällig ist manchmal, dass der in den Knochen hinein verlagerte Leichenknochen ein verschiedenes Verhalten zeigt, je nachdem er in einen erwachsenen oder in einen kindlichen Knochen gebracht wurde. Nach guter Einheilung zeigt er im ersteren Falle auch nach längerer Zeit keine Veränderung seiner Gestalt im Röntgenbilde, im kindlichen oder jugendlichen Knochen aber wird das todtte Ersatzstück mitunter schon nach 4—6 Monaten so stark angenagt, dass man im Röntgenbilde deutliche Spuren der Resorption wahrnimmt. Es hängt dies vermuthlich mit der grösseren Gefässfülle des jugendlichen Knochens zusammen.

Die besten Erfolge ergiebt der frisch und lebenswarm überpflanzte menschliche Knochen. Nur selten habe ich

ihn demselben Menschen entnommen; denn häufige Amputationen wegen trockenen Altersbrandes gaben reichliches Material zur frischen Knochenverpflanzung. Mit diesen frischen menschlichen Knochen habe ich niemals einen Misserfolg erlebt, wenn sie sammt dem anhaftenden Perioste selbst in periostlose Defecte von 20 bis 30 cm zum Ersatze der Diaphyse, Meta- und Epiphyse verpflanzt worden waren. Zwar kann ich histologische Einzelheiten nicht geben, doch zeigt die Erfahrung mit Bestimmtheit, dass die Mitverpflanzung der Knochenhaut ausserordentlich wichtig ist, wenn es sich um grosse periostlose Lücken handelt. Worin diese Bedeutung des Periostes für die Knochentransplantation liegt, weiss ich nicht, da ich keine Präparate von den operirten Kranken gewonnen habe. Es ist möglich, dass das Periost frisch mit dem Knochen übertragen, seine knochenbildende Thätigkeit fortsetzt, wie das v. Mangoldt, Sultan und neuerdings vor Allem Axhausen auf Grund ihrer Untersuchungen behauptet haben. Es ist klar, dass hierdurch die Calluswucherung von den Defectgrenzen aus mit Vortheil zum allmählichen Ersatze des eingepflanzten Stückes unterstützt wird. Daneben liegt aber die Bedeutung des anhaftenden Periostes sicher auch darin, dass es rasch und innig mit der Umgebung in Verbindung tritt und das Einwachsen grösserer Gefässe in die Knochenoberfläche verwehrt, also gleichsam den Knochen vor der Resorption schützt.

Die Mitverpflanzung des Periostes ist nur in Defecten, deren Knochenhaut erhalten ist, unnöthig. Hier tritt auch durch die doppelte Periostlage mitunter, wie ich es gesehen habe, eine sehr starke unregelmässige Knochenwucherung auf. Doch auch bei Verlagerungen in die Spongiosa oder Markhöhle scheint mir diese Mitverpflanzung von Vortheil. Bezüglich des Knochenmarkes im verpflanzten Knochenstück habe ich die Erfahrung gemacht, dass bei grossen Ersatzstücken von Röhrenknochen aus amputirten Gliedern leicht aseptisches Fieber mit entzündlichen Erscheinungen auftritt, wenn der transplantierte Knochen Mark enthält. Diese unangenehmen örtlichen und allgemeinen Störungen sind jedoch nicht auf eine Bakterieninfection zu schieben. Denn das untersuchte Wundsecret war allemal bakterienfrei, und die Einheilung glückte trotz der Entzündung. Deshalb vermuthete ich als Grund dieser Erscheinungen eine Resorption von Zerfallsproducten des

Knochenmarkes und entfernte dieses in späteren Fällen vor der Einpflanzung mit dem Löffel. Um aber todte Räume im Ersatzstücke zu vermeiden, wurde dessen Markhöhle mit Jodoformknochenplombe gefüllt. Bei diesen Fällen unterblieb die entzündliche Reaction.

Ueber die bisher bekannte Verwendung der freien Knochenplastik will ich mit wenigen Worten hinweggehen.

Schädeldefecte habe ich, wenn sie traumatisch waren, nur secundär verschlossen und stets wie primär oder secundär die operativen Defecte mit freier Plastik. Bei kleineren Schädellücken gelingt es leicht, aus der Umgebung genügend grosse Platten aus der Tabula externa zu gewinnen, bei grösseren Defecten habe ich Periostknochenplatten oder Spongiosapplatten aus den Kniegelenkephysen amputirter Beine frei verpflanzt.

Dadurch sind grosse Defecte von 8 zu 10 cm und 5 zu 15 cm ersetzt worden.

Enthält der vom Defect abgehobene oder über ihn verschobene Hautlappen Periost, so braucht das Ersatzstück natürlich nicht mit Knochenhaut versehen zu sein. Das Verfahren scheint mir noch erheblich einfacher als die Verwendung von Periostknochenscheiben, welche mit einem Perioststiele versehen sind.

Bei Sattelnasen, tief eingesunkenen Stellen über der früher operirten Stirnhöhle, über Knochendefecten nach Ostitis tuberculosa der Gesichtsknochen, bei plumpen unförmigen Nasenspitzen nach totaler Rhinoplastik und bei im Wachsthum zurückgebliebenem Oberkiefer grösserer Hasenschartenkinder wurde immer von kleinen Einschnitten aus die Unterminirung der Weichtheile, soweit sie gehoben werden sollten, vorgenommen und entsprechende Periostknochen- oder Knorpelstücke untergeschoben, welche zumeist aus amputirten Gliedern, aus der Tibiakante oder einer Rippe desselben Patienten frisch übertragen wurden. Einzelheiten muss ich mir versagen, nur ein Versuch sei besonders hervorgehoben. Es ist bekannt, dass man immer mehr dazu neigt, die vollständige Nasenplastik aus dem Arme statt aus der Stirne vorzunehmen. Das Verfahren Israel's liefert hierzu das nöthige Knochenstück aus der Ulna, von wo es im Zusammenhange mit einem gestielten Hautlappen übertragen wird. Aber abgesehen davon, dass diese Knochenspanne sich nicht fest auf die Ränder

der Apertura pyriformis stützen kann, wie die nach Schimmelbusch dachförmig aufgestellte Knochenplatte, besteht bei diesem Verfahren noch der Nachtheil, dass zwischen der Knochenspanne und der Haut zu viel Bindegewebe liegt, das allmählich in den Zustand des chronischen Oedems geräth. Dadurch ergeben sich sehr plumpe Nasen, an denen nicht viel mehr durch Nachoperationen zu verbessern ist. Man kann diese Schwierigkeit sehr einfach dadurch umgehen, dass man unter die Haut des Vorderarmes zwei breite Knochenperiostplatten von gleicher Grösse dicht nebeneinander einheilt, damit sie später, mit dem Lappen verpflanzt, dachförmig aufgestellt werden können. Freilich müssen diese Knochenplatten vollkommen glatt und gleichmässig sein; denn Unregelmässigkeiten würden sich sofort an der neuen Nase durch die dünne Hautdecke hindurch bemerkbar machen. Obgleich ich mit den so gewonnenen Nasen zufrieden war, versuchte ich einmal ein ganzes Nasengerüst ähnlich wie eine Maskennase zu formen. Es wurde aus der unteren Epiphyse eines Femur von einem amputirten Beine gewonnen. Der Gelenkknorpel bildete den Rücken und die Spitze, die Seitenwände wurden aus der Spongiosa hergestellt, indem das künftige Naseninnere mit der Fraise ausgebohrt wurde. Dieses Gebilde setzte ich unter einen dünnen Hautlappen des Vorderarmes, der es auf seiner künftigen Aussenseite bekleidete, während die Innenparthie mit einem Muskellappen bedeckt wurde. Nachdem diese Ersatznase jetzt drei Monate gut eingeheilt ist, kann sie demnächst in das Gesicht verpflanzt werden, was ja keine Schwierigkeiten mehr bietet (und inzwischen geschehen ist). Die Form dieser Ersatznase ist sehr gut. Man sieht und fühlt ihre vollkommen gleichmässigen Umrisse durch die dünne Hautdecke hindurch. Vielleicht kommt man auf diesem Wege zu etwas besseren Nasen, als wir sie bisher erzielen konnten.

Die behandelten Defecte der Röhrenknochen und des Unterkiefers waren meist durch Operation, nur einmal durch Trauma entstanden. An den kurzen Röhrenknochen giebt nach Entfernung der an Tuberculose kranken Diaphyse die Einpflanzung einer Periostknochenspanne nach W. Müller sehr gute Erfolge. Ich habe die Ersatzstücke jedoch nicht wie Müller der Ulna entnommen, sondern aus amputirten Gliedern. Während man beim

Ersatze der kurzen Röhrenknochendiaphysen die Befestigung lediglich mit Hilfe von Einspiessen in die Epiphyse vornimmt, ist bei Defecten grosser Röhrenknochen ein ähnliches Einspiessen oder Einkeilen in die Markhöhle weniger zu empfehlen. Denn hier ist es nothwendig, dass das Ersatzstück von Anfang an sehr fest und in guter Stellung eingefügt liegt. Es darf sich nicht verschieben und winkelige Knickungen wie leicht nach dem Einkeilen veranlassen. Es empfiehlt sich, die beiden Enden des Ersatzstückes, welches in seiner Stärke dem zu ersetzenden Knochen ähnlich sein soll, mit je einem Knochenbolzen zu versehen. Dieser besteht am besten aus einem etwa 10 cm langen Stücke einer frischen, mit Periost bekleideten Fibula und wird auf jeder Seite in die Markhöhle des im übrigen mit Jodoformplombe gefüllten Ersatzstückes zur Hälfte eingetrieben. Die beiderseits vorstehenden Enden der Bolzen kommen in die Markhöhle der Knochenenden. Dadurch wird die Form des ganzen Knochens im Zusammenhange hergestellt und das Anlegen eines gefensterten Gipsverbandes sehr erleichtert. Auf diese Weise habe ich mehrere vollkommen periostlose Defecte des Oberarmes, des Oberschenkels, der Tibia und der Vorderarmknochen durch frische, wenn möglich entsprechende Knochen ersetzt; darunter Defecte von 25—30 cm Ausdehnung.

Es ist in practischer Hinsicht bemerkenswerth, dass man selbst so grosse und von Periost entblösste Defecte der grossen Röhrenknochen mit gutem Erfolge auch bezüglich der Function zur Heilung bekommt, und dass ich trotz der Grösse der verpflanzten Knochenstücke mit frischem periostbekleidetem Materiale niemals einen Misserfolg hatte. Daher erscheint es merkwürdig, dass man derartige Versuche nicht häufiger gemacht hat. Trotzdem schon 1894 v. Bramann berichtete, dass er einen grossen Humerusdefect mit einem Periostknochenstück aus der Tibia desselben Kranken mit vollem Erfolge überbrückt hatte, hört man erst in der neueren Zeit etwas mehr von derartigen grösseren Transplantationen. Ich glaube, man stand, wie es mir auch ging, zu sehr unter dem Banne der Versuchsergebnisse von Barth. Wenn, wie dieser zeigte, in dem transplantirten Stücke alles Gewebe, Periost, Knochen und Mark zu Grunde geht und erst langsam von den Grenzen des Defectes durch den einwachsenden Callus ersetzt werden muss, und, wenn es in Folge

dessen gleichgültig ist, ob man todtten oder lebenden Knochen verwendet, so ist kaum zu erwarten, dass ein grosser Röhrenknochen-defect, der kein Periost mehr besitzt, durch Einpflanzung eines grossen Ersatzstückes dauernd überbrückt werden kann. Hier beweist aber gerade die klinische Erfahrung, dass die Ergebnisse der wichtigen Thierversuche Barth's nicht in vollem Maasse für die Verhältnisse beim Menschen gelten können.

Am Unterkiefer habe ich einmal nach Resection der einen Hälfte wegen Carcinom einen entsprechenden Abschnitt eines Leichenunterkiefers eingeheilt, da ich dem alten Patienten nicht eine Rippe reseciren wollte, und Amputationsmaterial gerade nicht zur Verfügung stand. Das gut passende Ersatzstück würde nach genauer Naht der Schleimhaut in den Defect eingefügt und mit Draht festgenäht. Der Erfolg war der, dass der Kranke von Anfang an seinen Mund gut öffnen konnte. Nach entzündungsloser Einheilung gab es später eine Fistel. Da sich auch bald ein Recidiv entwickelte, schickte der Arzt den Kranken nicht mehr zur Klinik. Eine dauernde Einheilung wäre wohl kaum zu Stande gekommen, da es sich ja um einen periostlosen Defect handelte. In einem 2. Falle ersetzte ich den wegen Sarkom, ebenfalls sammt Periost resecirten Unterkieferabschnitt von 8 cm mit einem frischen, periostbekleideten Knochenstücke aus der Tibia eines amputirten Unterschenkels. Selbst wenn solche Versuche leicht einmal misslingen, da ja immer mit dem Einwandern von Entzündungserregern aus der Schleimhautnaht zu rechnen ist, so sind sie doch zu empfehlen. Denn bei vollem Erfolge ist man über alle Schwierigkeiten einer Prothese hinweg, und der Misserfolg ist nicht schlimmer als nach dem Ueberbrücken des Defectes mit Draht oder mit Metallschienen, die ja ebenfalls häufig später herausgenommen werden müssen. Sind amputirte Glieder nicht zur Hand, so eignen sich am besten entsprechend gebogene Rippenstücke, welche man demselben Patienten sammt Periost entnimmt.

Zur Heilung von Pseudarthrosen mit starken Verschiebungen der Knochenenden habe ich ganz ähnlich wie zur Befestigung der Ersatzstücke in Defecten grosser Röhrenknochen, die Bolzung verwandt. Man steckt den Bolzen zuerst in die Markhöhle des einen Endes, dann aber muss man in der Regel die des anderen Endes durch Bildung eines mit dem Periost im Zusammenhange bleibenden Splitters

öffnen, um den Bolzen auch hier in die Markhöhle hineinzubringen. Mit einer Drahtschlinge wird er hier sammt dem abgelösten Splitter festgehalten. Auch bei der schwierig zu behandelnden Pseudarthrose des Schenkelhalses habe ich zweimal die Festigung der Fracturstelle mit Bolzung versucht. Man stellt dieselbe, so gut es geht, im Schede'schen Tische richtig, legt sie dann am besten von vorne frei, um sie gut übersehen zu können und bohrt unter genauem Zielen vom Trochanter aus mit Hilfe einer Bohrfräse einen Canal durch den Trochanter und Hals bis in den Kopf. Der Bohrcanal wird darauf mit einem starken Knochenbolzen versehen, wozu ich einmal eine frische periostbekleidete Fibula aus einem amputirten Beine, das 2. Mal einen dicken Knochenspan aus der Tibiakante desselben Kranken genommen habe. Das Verfahren ist einfacher als die Naht oder Nagelung und stellt bessere Wundverhältnisse her als diese Verfahren, da die Bruchstelle nicht allseitig wie meist bei diesen freigelegt zu werden braucht. Ich möchte derartige Versuche, obgleich diese ersten beiden Fälle wegen einiger Fehler mir nicht sonderlich geglückt sind, empfehlen.

Die Bolzung der Femurhalspseudarthrose führt mich weiter zu ganz ähnlich ausgeführten Versuchen, zur Versteifung paralytischer Gelenke, vor allem des Fussgelenkes, das ich durch Bolzung 19mal, weniger des Kniegelenkes, das ich damit 4mal versteift habe.

Es handelte sich für mich darum, ein Verfahren zu gewinnen, das einfacher und sicherer im Erfolge ist, als die gewöhnlich geübte Arthrodese, welche ja wegen ihres häufigen Misslingens in Folge der malacischen Knochen einen verhältnissmässig grossen Eingriff darstellt, und natürlich auch dauerhafter ist als die tendinöse Fixation des Fusses. Ich versuchte folgendes Verfahren: Zur Versteifung des Fusses (Art. talo-cruralis und Art. talo-calcanea) macht man bei richtig gestelltem Fusse an der Fusssohle, im vordersten Abschnitte der Ferse, vor dem Tuber calcanei, eine 3 cm lange Längsincision genau in der Mitte bis auf den Knochen. Während zwei stumpfe Wundhaken die Hautränder sammt der längsgespaltene Aponeurose und der Sehne des Flexor brevis auseinanderziehen, setzt man die Bohrfräse auf die untere Fläche des Fersenbeines und bohrt unter genauem Zielen einen Canal durch den Calcaneus und den Talus. Sobald sich die Bohrfräse in der Epiphyse der Tibia befindet, sind die beiden Sprung-



gelenke festgestellt. Nach Herausnahme der Fraise wird sofort der Knochenbolzen an ihre Stelle gebracht. Mit einem Stempel treibt man ihn durch Hammerschläge so tief, als die Fraise gekommen war, dann nimmt man mit einer Luer'schen Zange den überstehenden Theil fort, damit der Bolzen mit der unteren Fersenbeinfläche abschneidet. Die kleine Hautwunde wird darauf mit 1—2 Fäden geschlossen, nicht dicht vernäht, damit das aus den Knochen abfließende Fett in die Verbandstoffe gelangen kann. Ein Pappschiennenverband, welcher das Herabsinken des gelähmten Fusses verbietet, beendet die Operation, die leicht, wenn alles vorher gerichtet ist, in 5 Minuten ausgeführt werden kann. Die durch die Operation erreichte Feststellung ist bisher geblieben. Der älteste Fall liegt 2 Jahre zurück und zeigt vollkommene Versteifung. Schwieriger ist, das Kniegelenk durch Bolzung zu versteifen. Ich habe einen oder zwei Bolzen von der Tuberositas tibiae aus eingetrieben, nachdem an ihr mit dem Meissel ein stufenförmiger Absatz gebildet worden war. So sehr ich das einfache Verfahren für die Sprunggelenke empfehlen kann, am Knie muss ich die Arthrodesis für besser halten. Die Equino-Varusstellung des Fusses habe ich bei Kindern entweder dadurch beseitigt, dass ich Stiefel tragen liess, deren äusserer Sohlenrand durch Federkraft gehoben wurde, oder ich habe bei stärkerer Deformirung des Fuss skelettes das Gelenk zwischen Metatarsus V und Cuboideum nach Resection entsprechender Knorpel-Knochenscheiben versteift, wozu eine Drahtnaht verwendet wurde.

Für den Erwachsenen ist die Versteifung mittels Bolzung am Fusse unzweifelhaft von Vortheil. Bei Kindern habe ich schädliche Einflüsse nicht gesehen, aber hier kann ja eingewendet werden, dass die manchmal nicht zu vermeidende und für die Feststellung auch sehr gute Durchbohrung der unteren Wachstumszone der Tibia einen Nachtheil bedeutet. Ob derselbe an den schwächlichen und im Wachstume an sich schon zurückbleibenden Beinen wirklich von Bedeutung ist, müssen spätere Beobachtungen erweisen. Heute steht mir als ältester Fall der vor 2 Jahren operirte zur Verfügung. An diesem Kinde beträgt die Verkürzung des vollkommen gelähmten Beines 2 cm, genau so viel wie vor der Operation, obgleich hier nicht nur die Sprunggelenke, sondern auch das Kniegelenk, und zwar mit Durchbohrung der Knorpelfugen versteift worden waren.

Die Bolzung mit Leichenknochen zeigte im Verlaufe einige Verschiedenheiten von der mit frischen Knochen vorgenommenen, welche zum grössten Theil aus der Fibula von amputirten Gliedern, zum kleineren aus der eigenen Fibula des gelähmten Beines genommen waren. Während die mit frischen Knochen versteiften Fussgelenke bald nach der Operation belastet werden konnten, hatten die mit Leichenknochen gebolzten längere Zeit Schmerzen. Auch öffnete sich hier manchmal nach 2 oder 3 Wochen die Narbe, um ein seröses Secret ansfliessen zu lassen, obgleich der Knochen einheilte. Diese Fisteln heilten wieder. Im Röntgenbilde ergab sich, dass der Leichenknochen etwas unregelmässig wurde, zum Theil an den Enden auch schwand. Zwar verlor sich auch die Contur des frisch verpflanzten Knochens, aber hier sah man deutlich im Röntgenbilde eine Verdickung seiner Corticalis eintreten, die später verschwommen in die Structur der festgestellten Knochen übergeht. Interessant ist in dem ältesten, vor 2 Jahren operirten Falle das Verhalten des (frischen) Bolzens in den Gelenkspalten. Man sieht jetzt nach 2 Jahren, dass der erheblich verbreiterte Bolzen allmählich in die Maschen der Umgebung übergeht, aber in den Gelenken etwas verdünnt ist, besonders stark im Knöchelgelenk. Doch kann man deutlich sehen, dass dieser Gelenkspalt feine Knochenmaschen enthält, welche von dem Bolzen auszustrahlen scheinen. Wahrscheinlich besorgen die von der Gelenkhaut in den Gelenkspalt und in den Bolzen einwachsenden Gefässe rascher eine kräftige Resorption als innerhalb der Knochen. Vielleicht wird auch durch diese Gefässe der Gelenkknorpel völlig zerstört und die knöcherne Verwachsung auch dadurch eingeleitet. Zahlreiche Thierversuche meines Assistenten Frangenheim sollen nach längerer Beobachtungsdauer diese Verhältnisse klarlegen.

Die Verpflanzung eines ganzen Röhrenknochens oder eines grossen Abschnittes sammt Epiphyse und Gelenkfläche habe ich zum ersten Male vor 7 Monaten bei folgendem Patienten versucht:

Bei einem 38jährigen Manne lag eine Auftreibung des oberen Schienbeindrittels am linken Beine vor, die nach ihren Erscheinungen, dem Befunde und nach dem Röntgenbilde als ein centrales Sarkom diagnostiziert werden musste. Ein Durchbruch durch die Corticalis war an der Tuberositas tibiae wahrschein-

lich, aber von unbedeutender Ausdehnung. Nach dem Röntgenbilde reichte der Tumor bis an den Gelenkknorpel. Ich plante daher die Resection des befallenen Knochenabschnittes und liess zum etwaigen Ersatze des resecurten Stückes gleichzeitig einen alten Mann mit trockenem Altersbrande des Fusses (ohne Pulsation in der Kniekehle) zur Operation vorbereiten. Mit einem grossen Lappenschnitte, der oben in der Höhe des Gelenkspaltes gestielt war, wurde die erkrankte Gegend von vorne freigelegt. An einer kaum 5 Pfennigstück grossen Stelle der Tuberositas hatte der Tumor die Corticalis durchbrochen, war aber noch vom Periost bedeckt. Beim Ablösen des Ligamentum proprium ergab sich, dass seine Ansatzstelle vom Sarkom ergriffen war. Deshalb wurde das Ligament oberhalb der Tuberositas im Gesunden durchtrennt, im Uebrigen blieb es ebenso wie die abgelöste Gelenkkapsel in Verbindung mit dem Lappen. Nach Durchtrennung der Gelenkbänder folgte dann die Freilegung des ganzen erkrankten Tibiatheiles sammt dem Perioste und seine Resection. Der Durchschnitt des Präparats ergab ein grosscystisches bis zum Gelenkknorpel reichendes Sarkom. Genau dasselbe Tibiasstück wurde sodann aus dem gleichzeitig amputirten Beine entnommen, und zwar sammt seinem Perioste und dem Gelenkknorpel. Da es an der Diaphysenseite etwas länger gelassen und hier zugespitzt wurde, konnte es nach Entfernung des Knochenmarkes und nach Ersatz desselben durch Plombe in die Markhöhle des Knochenendes eingekleimt werden. Dadurch war der ganze Defect durch ein ebenso grosses und entsprechendes Knochenstück ersetzt. Der einzige Uebelstand war der, dass das Ersatzstück aus einem rechten Beine für das linke genommen werden musste. Doch haben sich später wesentliche Nachteile daraus nicht ergeben. Die abgelöste Gelenkkapsel wurde mit einigen Fäden am Perioste befestigt, das Lig. patellare proprium wurde in der Nähe der neuen Tuberositas festgenäht. Darauf folgte die genaue Naht des grossen Lappens. Die Heilung erfolgte ohne Zwischenfälle. Von der 6. Woche an blieb der feststellende Verband fort, und es wurde vorsichtig activ und passiv bewegt. Der Patient kann jetzt, 7 Monate nach der Einpflanzung, ohne Beschwerden stehen und gehen, wenn auch etwas unsicher. Die Beweglichkeit des Unterschenkels ist zufriedenstellend. Die Streckung kann vollkommen, die Biegung bis zu 45 Grad ausgeführt werden. Vorsichtshalber trägt er, wenn er nicht Bewegungs- und Gehübungen vornimmt, einen Schienenhülsenapparat. An den von Zeit zu Zeit angefertigten Röntgenbildern sieht man, dass von dem Knochenende aus ein kräftiger Callus um das untere Ersatzstück herum gewachsen ist. Dadurch ist eine vollkommene Befestigung der Einkeilungsstelle eingetreten. Die ehemals bis nahe an den Gelenkknorpel reichende Jodoformplombe ist von oben nach unten schon über die Hälfte resorbirt worden, also muss doch auch schon in der Spongiosa der Epi- und Metaphyse Leben sein. An der Corticalis sieht man deutliche periostale Verdickungen, nirgends die Erscheinungen der Resorption, auch der Gelenkknorpel ist in der Bildern heute noch ebenso glatt wie sofort nach der Verpflanzung. Durch die ganze Operation ist unzweifelhaft viel mehr erreicht worden, als man es nach unseren üblichen Verfahren erreicht hätte. Früher

haben wir derartigen Fällen nach der Resection dadurch zu einem brauchbaren Beine verholfen, dass wir das Ende der Tibia in ein Loch der Femurepiphyse steckten. Der Erfolg war ein sehr stark verkürztes und steites Bein, das ja allerdings mit der nöthigen Unterlage im Stiefel genügte. Hier haben wir aber ein bewegliches Bein, das noch dazu im Kniegelenk ausreichend beweglich ist. (Demonstration.)

Der 2. derartige Versuch betrifft einen Oberarm.

Bei einem 25jährigen Manne wurde, nachdem die obere Humerushälfte wegen eines bis zum Gelenkknorpel reichenden myelogenen Sarkoms entfernt worden war, der ganze etwa 20 cm lange, vollkommen periostlose Defect mit gutem Erfolge bezüglich Einheilung und Function dadurch ersetzt, dass eine untere Femurhälfte eines amputirten Beines sammt Periost und einem der Form des Humeruskopfes entsprechenden Theile des inneren Condylus, versehen mit Gelenkknorpel, eingepflanzt wurde. Mit dem Diaphysenende wurde das grosse Ersatzstück mit Hilfe eines 5 cm grossen Bolzens (aus der Fibula desselben Beines) in richtiger und fester Stellung vereinigt. Das humeruskopffähnliche Ende wurde nach Anlegung einer Tabaksbeutelnaht am freien Rande der abgelösten Gelenkkapsel in die Fossa glenoidalis gebracht, worauf die Naht über ihm zugeschnürt und der Kapselansatz mit 2 Nägeln am Knochen befestigt wurde. Die Heilung ist in ausgezeichnete Stellung des Knochens glücklich, die Beweglichkeit des Armes gelingt zur Zeit activ bis zur Horizontalen.

Bei einem 3. Falle, einem 16jährigen Mädchen, handelte es sich um ein grosses Chondrom der Grundphalanx des linken Ringfingers. Dasselbe hatte den Knochen zerstört und reichte beiderseits bis zum Gelenkknorpel. Von der zuerst geplanten Exarticulation wurde Abstand genommen und versucht, den Finger zu erhalten, obgleich die ziemlich mühevoll Exstirpation des Tumors nur zugleich mit den beiden Gelenkknorpelflächen gelang. Das Periost konnte natürlich nirgends erhalten bleiben. Ein eben amputirter Fuss gab willkommenes Material zum Ersatze. Es wurde ihm die Grundphalanx der 2. Zehe sammt Periost und den beiden Gelenkflächen entnommen. Der Versuch, den Ersatzknochen irgendwie an den Gelenkkapseln zu befestigen, misslang; doch konnte er durch einige subcutane Catgutnähte, welche ihn überspannten, gut in seiner richtigen Lage gehalten werden. Die Heilung ging glatt von Statten. Die Beweglichkeit ist jetzt, 11 Wochen nach der Einpflanzung, in vollem Maasse passiv möglich. Activ ist sie geringer, was wohl auf die im Verhältniss etwas zu langen Sehnen zurückzuführen ist, da ja der Ersatzknochen erheblich kürzer ist als die entfernte Phalanx. Durch Verkürzung der Muskeln dürfte sich die noch bestehende Störung wohl ausgleichen.

Ein 4. Fall betrifft einen 48jährigen Mann, dessen Ulnahälfte am linken Arme wegen eines myelogenen, noch nicht durchgebrochenen Sarkomes reseziert werden musste. Da die Natur der beträchtlichen Knochenauftreibung nach dem Befunde und der Röntgenaufnahme völlig klar war, und somit über die notwendige Resection kein Zweifel bestand, liess ich den Kranken 2 Wochen warten, bis durch eine Amputation das nöthige frische Knochenmaterial zum Ersatze gegeben war. Auch hier wurde der erkrankte Knochenabschnitt sammt

Periost und der unteren Ulnagelenkfläche entfernt und der Defect durch ein mit Periost bekleidetes Knochenstück ersetzt. Dasselbe wurde aus der unteren Hälfte der Tibia des Amputirten zurechtgeformt, die Knochenmarkhöhle mit Plombe gefüllt. Das Periost des Ersatzknochens konnte jedoch nur an der einen Seite erhalten werden, da von der Corticalis viel fortgenommen werden musste, um die Stärke des Knochens der Ulna gleich zu machen. Aus der unteren Gelenkfläche der Tibia entstand die untere der Ulna. Am Handgelenke wurde das Ersatzstück durch einige Catgutnähte, oben in der Diaphyse durch Einkeilen befestigt. Durch die auch hier gelangene Einheilung hat sich die Stellung der Hand vollkommen normal erhalten, auch die Form des Vorderarmes ist normal geblieben. Zur Zeit, 4 Wochen nach der Operation, kann der Kranke seine Hand ohne Schmerzen bewegen und gebrauchen, so dass er seinen Beruf als Lehrer wieder aufgenommen hat. Er behauptet sogar, wieder Clavier spielen zu können. (Demonstration.)

Nach diesen Erfahrungen darf man es als erwiesen betrachten, dass selbst an grossen Gelenken halbe Gelenkdefecte durch frische Transplantation eines geeigneten, mit Gelenkknorpel und Periost ausgestatteten Knochens ersetzt werden können, und dass dadurch bezüglich der späteren Function annähernd normale Ergebnisse erzielt werden.

Wie aber hier halbe Gelenke mit Erfolg transplantiert worden sind, gelingt es auch, ganze Gelenke — natürlich ebenfalls aus frisch amputirten Gliedern — einzuheilen, d. h. beide zu einem Gelenke gehörende Epiphysen sammt ihrem Knorpel.

Ich bin zu diesen Versuchen auf dem Wege der Mobilisirung knöchern versteifter Gelenke gekommen.

Zur Zwischenlagerung in die am Ellbogen bogenförmig durchtrennte Synostose benutzte ich zwei dünne Gelenkknorpelscheiben, die ich einander so gegenüber lagerte, dass eine jede die zugehörige Knochensägefläche bekleidete. Am Ellbogen lässt sich hierdurch oder durch anderweitige Zwischenlagerungen, wenn nur die Knochenflächen charnierartig ineinandergreifen, ein sehr gutes Ergebniss erzielen. Was wir aber im Allgemeinen bei der Operation knöchern versteifter Gelenke erreichen, ist nicht sehr viel. Macht man eine wenig ausgedehnte Resection, so bekommt man den Zustand der Pseudarthrose, den wir ja mit der Zwischenlagerung nachahmen. Die Beweglichkeit ist dementsprechend oft nur gering. Resectirt man aber sehr ausgedehnt, so erhält man zwar ausgiebige Beweglichkeit, aber ein haltloses schlotterndes Gelenk, das Schlotter-

gelenk. Es ist keine Frage, dass beide Zustände an bestimmten Gelenken der oberen Extremität oder am Kiefer genügen. Aber an vielen Gelenken, besonders am Beine, brauchen die Gelenkflächen gegenseitigen Halt und Gelenkhemmungen, welche abnorme Bewegungen ausschliessen. Dies kann nur erreicht werden, wenn man die Gelenkflächen möglichst normal gestaltet. Um dieser Forderung, namentlich am Knie, an dem die bisherigen Verfahren keine glänzenden Ergebnisse zu verzeichnen hatten, zu genügen, und um gleichzeitig ein normales Gewebe zwischenzulagern, kam ich auf den Gedanken, ganze Gelenke zu transplantiren.

Von den beiden Fällen, bei denen ich diesen Gedanken bisher verwirklicht habe, ist der erste am 2. 11. 1907, also vor sieben Monaten, der zweite vor vier Monaten operirt worden. Beide Male handelte es sich um Synostosen des Kniegelenkes mit starker Beugstellung des Unterschenkels, einmal nach Eiterung, das andere Mal nach Tuberculose. Zur Freilegung auf der vorderen Seite benutzte ich einen grossen Lappenschnitt, dessen unteres Ende in der Höhe der Tuberositas tibiae verlief, um Reste des Lig. patell. propr. und der Gelenkkapsel mit dem Lappen abheben zu können. Aber nur in dem ersten Falle war noch ein Ligament vorhanden, die Kapsel war beide Male zerstört. Nach Freilegung der Synostose von vorne wurden die Weichtheile sammt Sehnenansätzen auf den Seiten und in der Kniekehle stumpf und scharf vom Knochen gelöst. Das narbig veränderte Periost blieb am Knochen. Danach wurde die ganze ehemalige Gelenkgegend keilförmig resecirt, wie es eben die Herstellung der richtigen Stellung erforderte. Der Defect war in beiden Fällen bei ausgestrecktem Unterschenkel etwa drei Finger breit. Zum Ersatz wurde aus frisch amputirten Beinen das Kniegelenk resecirt. Die übertragenen Theile enthielten die ganzen Gelenkflächen, von jeder Epiphyse noch Knochen in Ausdehnung von etwa  $1\frac{1}{2}$  Finger Breite. Die beiden Stücke blieben durch ihre Kreuzbänder miteinander im Zusammenhang, die Menisken wurden nur im ersten Falle fortgenommen, im zweiten vollkommen erhalten, in diesem auch die seitlichen Kapselansätze. Die beiden Epiphysenstücke wurden in dem einen Falle durch Nagelung, in dem anderen durch Drahtnaht mit den entsprechenden Knochenflächen fest verbunden. Das in dem ersten Falle erhaltene Lig. patell. propr. wurde am Perioste wieder an-

genäht. Die Einheilung ist in den beiden Fällen vollkommen gelungen. Man sieht im Röntgenbilde, das von Zeit zu Zeit angefertigt wurde, dass von den Knochenenden aus kräftiger Callus an den Rändern die Epiphysenstücke überwächst, und dass die Knorpelflächen vollkommen glatt geblieben sind. In dem ersten Falle wollte die passive Beweglichkeit keine Fortschritte machen. Das lag an dem Wiederverwachsen der bei der Operation gelösten, aber leider nicht unterfütterten Patella. Deshalb musste der Lappen nach drei Monaten aufgeklappt werden, um die Kniescheibe zu entfernen. Die Gelegenheit, etwas über den Zustand des verpflanzten Gelenkes zu erforschen, war willkommen. Es zeigte sich in allen seinen Theilen erhalten. Der Knorpel sah gut und glatt aus, im Gelenkspalt fanden sich nur wenige Blutgerinnsel, die leicht entfernt werden konnten. Die Epiphysenstücke waren mit ihren Knochen so fest verwachsen, dass sie nicht im Geringsten zu bewegen waren. Die Kreuzbänder hatten sich ebenfalls erhalten, bluteten sogar nach kleinen Einschnitten. Zur mikroskopischen Untersuchung konnte ich mir nicht versagen, eine dünne Scheibe aus der unteren Epiphyse auszumeisseln. Sie wurde so gewonnen, dass sie sowohl Gelenkknorpel als die Spongiosa der Epiphyse und die Verwachsungsgrenze mit der Tibia enthält. Es ergab sich, dass die Verwachsung durch dichtes Bindegewebe und neuen Knochen gebildet war, dass der Gelenkknorpel gut färbbare Zellen ebenso wie die mit Gefäßen gefüllten Markräume der Spongiosa enthielt. Nach diesem Befunde dürfte wohl auch histologisch eine Einheilung bestehen. Die beiden Patientinnen haben durch active und passive Bewegungsübungen bis jetzt einen geringen Grad von Beweglichkeit erhalten. Passiv kann man bei der ersten den Unterschenkel bis fast 45 Grad beugen. Schmerzen bestehen nicht, weder beim Gehen noch beim Stehen. Eine seitliche Beweglichkeit ist nicht vorhanden. Ist damit auch die gelungene Einheilung bewiesen, so betrachte ich dieselbe natürlich nur als einen wohl gelungenen aber nothwendigen Vorversuch. Die Behandlung ist noch lange nicht erschöpft. Da es wohl kaum möglich ist, am Kniegelenke eines Erwachsenen gleichzeitig mit den Gelenkenden der Knochen auch die Gelenkkapsel mit zu verpflanzen und ohne Gefahr der Nekrose einzuheilen (was übrigens inzwischen bei einem Kinde gut gelungen ist), fragt es sich, ob

durch fleissige Uebungen eine Art von Gelenkkapsel etwa durch einen schleimbeutelartigen Ueberzug an der vorderen Seite des Gelenkes gebildet wird, oder ob es nöthig sein wird, den Lappen noch einmal zu lüften und seine Innenseite mit Serosa zu bekleiden. (Das letztere habe ich inzwischen an der ersten Patientin ausgeführt<sup>1)</sup>, da die Beweglichkeit zu wünschen übrig liess, während bei der zweiten Kranken von selbst eine gute Zunahme der Beweglichkeit festzustellen ist.) Dann kommt noch eine grosse Schwierigkeit. Es sind ja durch die Krankheitsprocesse weithin die Muskeln und Sehnen zerstört. Aber in den verschiedenen Verfahren der Muskel- und Sehnenverpflanzung haben wir heut zu Tage ein gutes Mittel, das vielleicht auch hierbei zu dem Erfolge der activen Beweglichkeit verhelfen wird.

Doch ich will keine weiteren Pläne entwickeln. Es kam mir mit dieser Mittheilung, die durch einen späteren ausführlichen Bericht ergänzt werden soll, lediglich darauf an, dass der Vorversuch, die Verpflanzung eines ganzen Gelenkabschnittes als gelungen anzusehen ist. Dies ist um so wichtiger, als Thierexperimente in dieser Richtung bisher nicht geglückt sind. Versuche, die mein Assistent Wrede unternommen hat, sind noch zu frisch, um klare Auskunft zu geben, denn man muss naturgemäss sehr lange Zeit verstreichen lassen, bevor man an die histologische Untersuchung gehen und Schlüsse aus ihr ziehen kann. Dass ich an die gelungenen beiden Operationen die Hoffnung knüpfe, auf diesem Wege, wenn auch erst nach Ueberwindung mancher und grosser Schwierigkeiten, eher zu brauchbaren und beweglichen Gelenken zu kommen, als Glück mit seinen elfenbeinernen Charnirgelenken, ist wohl verzeihlich und berechtigt.

Zum Schluss will ich noch einmal auf Grund der sämmtlichen Erfahrungen mit der freien Knochenplastik betonen, dass sich mit diesem Verfahren wohl viel mehr erreichen lässt, als man bisher annahm. Aber man muss frisches mit Periost versehenes menschliches Knochenmaterial lebenswarm und ohne jede mechanische oder chemische Schädigung sofort nach der Entnahme verpflanzen. Geht man mit seinem Amputationsmaterial (besonders Fälle mit Altersbrand ohne Phlegmonen) sparsam um, so lässt sich aus einem sonst fortgeworfenen Gliede oft gleichzeitig für mehrere Fälle dauernder Gewinn ziehen.

<sup>1)</sup> Siehe Medicinische Klinik. 1908. No. 22.
